# Supplementary material for: Cost analysis of two community-based HIV testing service modalities led by a Non-Governmental Organization in Cape Town, South Africa
Source: Springer Nature journal article supplement (doi:10.1186/s12913-017-2760-8), 2017-12-01
Supplement: MOESM1 [file 15274710]

## Additional Information – file 1

### Categories of core and support personnel included in the study

### Categories of core personnel directly involved with service provision in the CB-HTS project.

| Personnel category | Total employed for CB-HTS project | Total employed at study site (n=6) | Employed by          | Effort |
|--------------------|-----------------------------------|------------------------------------|----------------------|--------|
| NGO coordinator    | 5                                 | 1                                  | NGO                  | 50%    |
| HIV counsellors    | 15                                | 3                                  | NGO                  | 100%   |
| Professional nurse | 5                                 | 1                                  | SU (seconded to NGO) | 100%   |
| Enrolled nurse     | 5                                 | 1                                  | SU (seconded to NGO) | 100%   |
| Data Clerks        | 2                                 | N/A                                | SU                   | 100%   |

### Categories of personnel involved in supporting the CB-HCT project (not involved in direct service provision)

| Personnel category | Total personnel providing support (n=10) | Employed by | Effort          |
|--------------------|------------------------------------------|-------------|-----------------|
| Management         | 3                                        | SU          | 4%, 50% and 80% |
| Administration     | 1                                        | SU          | 100%            |
| Human resources    | 2                                        | SU          | Both 10%        |
| Data               | 2                                        | SU          | 25% and 20%     |
| Driver             | 1                                        | SU          | 100%            |
| NGO administrator  | 5                                        | NGO         | 20%             |
