# Supplementary material for: Cost analysis of two community-based HIV testing service modalities led by a Non-Governmental Organization in Cape Town, South Africa
Source: Springer Nature journal article supplement (doi:10.1186/s12913-017-2760-8), 2017-12-01
Supplement: MOESM2 [file 15274710]

## Additional Information – file 2

### Examples of costs included in each program component per cost categories per CB-HTS modality

| Cost categories              | HCT Modalities | CB-HTC project componenets                                   |                                                              |                                                              |                                                             |                                                              |                                                                                                                                                   |                                                                                                                                                                                                    |
|------------------------------|----------------|--------------------------------------------------------------|--------------------------------------------------------------|--------------------------------------------------------------|-------------------------------------------------------------|--------------------------------------------------------------|---------------------------------------------------------------------------------------------------------------------------------------------------|----------------------------------------------------------------------------------------------------------------------------------------------------------------------------------------------------|
|                              |                | Admin                                                        | Capacity Building                                            | Monitoring & Evaluation                                      | Data                                                        | Planning                                                     | Direct Services                                                                                                                                   | Overheads                                                                                                                                                                                          |
| (1) Personnel                | Stand-alone    | Proportion of core personnel costs                           | Proportion of core personnel costs                           | Proportion of core personnel costs                           | Proportion of core personnel costs                          | Proportion of core personnel costs                           | Proportion of core personnel costs                                                                                                                | Proportion of support personnel costs                                                                                                                                                              |
|                              | mobile         | Proportion of core personnel costs                           | Proportion of core personnel costs                           | Proportion of core personnel costs                           | Proportion of core personnel costs                          | Proportion of core personnel costs                           | Proportion of core personnel costs                                                                                                                | Proportion of support personnel costs                                                                                                                                                              |
| (2) Capital Items            | Stand-alone    | Proportion of a laptop, desktops, printers, office furniture | Proportion of a laptop, desktops, printers, office furniture | Proportion of a laptop, desktops, printers, office furniture | Proportion of a database server, laptop, desktops, printers | Proportion of a laptop, desktops, printers, office furniture | Point of care CD4 analyzer, glucometer, scale, blood pressure equipment, proportion of office furniture                                           | None                                                                                                                                                                                               |
|                              | mobile         | Proportion of a laptop, desktops, printers, office furniture | Proportion of a laptop, desktops, printers, office furniture | Proportion of a laptop, desktops, printers, office furniture | Proportion of database server, laptop, desktops, printers   | Proportion of a laptop, desktops, printers, office furniture | Mobile van, tents, point of care CD4 analyzer, glucometer, scale, blood pressure equipment, folding tables, plastic chairs                        | None                                                                                                                                                                                               |
| (3) Recurring goods/services | Stand-alone    | Proportion of stationery and printing                        | Proportion of stationery and printing                        | Proportion of stationery and printing                        | None                                                        | Proportion of stationery and printing                        | Waste disposal, medical supplies, laboratory costs, HIV rapids test kits, condoms, printing                                                       | Proportion of rent, utilities, IT support, telephone, cleaning & sanitary services, NGO admin costs, general maintenance, occupational health insurance, vehicle running costs (support personnel) |
|                              | mobile         | Proportion of stationery and printing                        | Proportion of stationery and printing                        | None                                                         | None                                                        | Proportion of stationery and printing                        | Waste disposal, medical supplies, laboratory costs, HIV rapids test kits, condoms, printing, travel (towing caravan), caravan servicing/licencing | Proportion of rent, utilities, IT support, telephone, cleaning & sanitary services, NGO admin costs, general maintenance, occupational health insurance, vehicle running costs (support personnel) |
